# Supplementary material for: RAB5A in triple-negative breast cancer: a critical role in macrophage reshaping in an exosomal miR-21-dependent manner
Source: PubMed Central journal article supplement (PMC11046356; doi:10.1530/erc-23-0257), 2024-04-12
Supplement: supplementary_material.pdf [file supplementary_material.pdf]

## Supplementary Materials

Supplementary Table 1

Primer sequences used for qRT-PCR

| Gene                          | Sequence (5' to 3')                                       |
|-------------------------------|-----------------------------------------------------------|
| <i>RAB5A</i>                  | F-CAAGAACGATACCATAGCCTAGCAC<br>R-CTTGCCTCTGAAGTTCTTTAACCC |
| <i>CD163</i>                  | F-TTTGGACAAGCCGTGACTAGA<br>R-CATTCCCAGGTGTTGACATTCC       |
| <i>Arg1</i>                   | F-GTGGAAACTTGCATGGACAAC<br>R-AATCCTGGCACATCGGGAATC        |
| <i>IL-10</i>                  | F-CCTCCGTCTGTGTGGTTTGAA<br>R-CACTGCGGTAAGGTCATAGGA        |
| <i>iNOS</i>                   | F-GTTCCAGATGAATACTGGCAGTC<br>R-GCAACTGAACACTATCTTTCCCT    |
| <i>IL-1<math>\beta</math></i> | F-ATGATGGCTTATTACAGTGGCAA<br>R-GTCGGAGATTTCGTAGCTGGA      |
| <i>YOD1</i>                   | F-CTCCCCAAGTGTCATCCCTT<br>R-CTGTGCTTACCAGAACCGTG          |
| <i>FASLG</i>                  | F-CAAGGTCCATGCCTCTGG AA<br>R-TTGACCAGAGAGAGCTCAGATACG     |
| <i>TGFBI</i>                  | F-GTGTGTGCTGTGCAGAAGGT<br>R-CATATCCAGGACAGCACTCG          |
| <i>IL12A</i>                  | F-GATGGCCCTGTGCCTTAGTA<br>R-TCAAGGGAGGATTTTTGTGG          |
| <i>PEL11</i>                  | F-TGTAGTAACTGACACGGTTCCT<br>R-TCCATCTGATGTCTTCCATTTGG     |

Supplementary Table 2

Putative miRNAs previously reported involved in macrophage polarization and their corresponding references.

| Micro RNAs | Role of miRNAs in macrophage polarization                                                                                                                          |
|------------|--------------------------------------------------------------------------------------------------------------------------------------------------------------------|
| miR-375    | Facilitating the migration and infiltration of tumor-associated macrophage (TAM) <sup>[1]</sup> .                                                                  |
| miR-99b    | Facilitating the transformation into M1 macrophage <sup>[2]</sup> .                                                                                                |
| miR-222-3p | Facilitating the M1 macrophages transform to M2 macrophages <sup>[3]</sup> .                                                                                       |
| miR-511-3p | Suppressing the tumor-promoting effects of TAM <sup>[4]</sup> .                                                                                                    |
| miR-21     | Facilitating the TAM transform into tumor-promoting phenotypes <sup>[5, 6]</sup> ;<br>Facilitating the M1 macrophages transform to M2 macrophages <sup>[7]</sup> . |
| miR-145    | Facilitating the M1 macrophages transform to M2 macrophages <sup>[8]</sup> .                                                                                       |
| miR-125a   | Facilitating the M1 macrophages, and suppressing the M2 macrophages <sup>[9]</sup> .                                                                               |
| miR-98     | Facilitating the TAM transform into tumor-suppressing phenotypes <sup>[10]</sup> ; Facilitating the M2 macrophages transform to M1 macrophages <sup>[11]</sup> .   |

|             |                                                                                                                                                                        |
|-------------|------------------------------------------------------------------------------------------------------------------------------------------------------------------------|
| miR-100     | Facilitating the TAM transform into tumor-promoting phenotypes <sup>[12]</sup> .                                                                                       |
| miR-125b-5p | Facilitating the TAM transform into tumor-promoting phenotypes <sup>[13]</sup> .                                                                                       |
| miR-203     | Facilitating the M2 macrophage <sup>[14]</sup> .                                                                                                                       |
| miR-146a-5p | Facilitating the M2 macrophage <sup>[15]</sup> .                                                                                                                       |
| miR-28-5p   | Facilitating the TAM transform into tumor-suppressing phenotypes <sup>[16]</sup> .                                                                                     |
| miR-155     | Facilitating the M2 macrophages transform to M1 macrophages M2→M1 <sup>[17]</sup> ; Facilitating the TAM transform into tumor-suppressing phenotypes <sup>[18]</sup> . |
| miR-138-5p  | Facilitating the M1 macrophages transform to M2 macrophages <sup>[19]</sup> .                                                                                          |
| miR-340-5p  | Facilitating the M2 macrophages transform to M1 macrophages <sup>[20]</sup> .                                                                                          |
| miR-935     | Facilitating the M2 macrophages transform to M1 macrophages <sup>[21]</sup> .                                                                                          |
| miR-498     | Facilitating the M1 macrophages transform to M2 macrophages <sup>[22]</sup> .                                                                                          |
| miR-940     | Facilitating the M1 macrophages transform to M2 macrophages <sup>[23]</sup> .                                                                                          |
| miR-217     | Facilitating the M2 macrophages transform to M2 macrophages <sup>[24]</sup> .                                                                                          |
| miR-106b-5p | Facilitating the M1 macrophages transform to M2 macrophages <sup>[25]</sup> .                                                                                          |
| miR-934     | Facilitating the M2 macrophages <sup>[26]</sup> .                                                                                                                      |
| miR-142-3p  | suppressing the M2 macrophages <sup>[27]</sup> .                                                                                                                       |
| miR-9       | Facilitating the M1 macrophages <sup>[28]</sup> .                                                                                                                      |
| miR-195-5p  | suppressing the M2 macrophages <sup>[29]</sup> .                                                                                                                       |

## References

1. Frank, A.-C., et al., Apoptotic tumor cell-derived microRNA-375 uses CD36 to alter the tumor-associated macrophage phenotype - Nature Communications. Nature Communications, 2019. **10**(1135): p. 1-18
2. Wang, L., et al., Original research: Targeted delivery of miR-99b reprograms tumor-associated macrophage phenotype leading to tumor regression. Journal for Immunotherapy of Cancer, 2020. **8**(2)
3. Ying, X., et al., Epithelial ovarian cancer-secreted exosomal miR-222-3p induces polarization of tumor-associated macrophages. Oncotarget, 2016. **7**(28): p. 43076
4. Squadrito, M.L., et al., miR-511-3p Modulates Genetic Programs of Tumor-Associated Macrophages. Cell Reports, 2012. **1**(2): p. 141-154
5. Sahraei, M., et al., Suppressing miR-21 activity in tumor-associated macrophages

- promotes an antitumor immune response. *Journal of Clinical Investigation*, 2019. **129**(12): p. 5518-5536
6. Xi, J., et al., miR-21 depletion in macrophages promotes tumoricidal polarization and enhances PD-1 immunotherapy - *Oncogene*. *Oncogene*, 2018. **37**: p. 3151-3165
  7. Hsieh, C.-H., S.-K. Tai, and M.-H. Yang, Snail-overexpressing Cancer Cells Promote M2-Like Polarization of Tumor-Associated Macrophages by Delivering MiR-21-Abundant Exosomes. *Neoplasia*, 2018. **20**(8): p. 775-788
  8. Shinohara, H., et al., Regulated Polarization of Tumor-Associated Macrophages by miR-145 via Colorectal Cancer-Derived Extracellular Vesicles. *Journal of Immunology*, 2017. **199**(4): p. 1505-1515
  9. Zhao, J.-L., et al., Forced activation of notch in macrophages represses tumor growth by upregulating miR-125a and disabling tumor-associated macrophages. *Cancer research*, 2016. **76**(6): p. 1403-1415
  10. Li, L., et al., MiR-98 suppresses the effects of tumor-associated macrophages on promoting migration and invasion of hepatocellular carcinoma cells by regulating IL-10. *Biochimie*, 2018. **150**: p. 23-30
  11. Li, L., et al., MiR-98 modulates macrophage polarization and suppresses the effects of tumor-associated macrophages on promoting invasion and epithelial-mesenchymal transition of hepatocellular carcinoma. *Cancer cell international*, 2018. **18**(1): p. 1-10
  12. Wang, W., et al., miR-100 maintains phenotype of tumor-associated macrophages by targeting mTOR to promote tumor metastasis via Stat5a/IL-1ra pathway in mouse breast cancer - *Oncogenesis*. *Oncogenesis*, 2018. **7**(97): p. 1-17

13. Gerloff, D., et al., Melanoma-Derived Exosomal miR-125b-5p Educates Tumor Associated Macrophages (TAMs) by Targeting Lysosomal Acid Lipase A (LIPA). *Cancers*, 2020. **12**(2): p. 464
14. Takano, Y., et al., Circulating exosomal microRNA-203 is associated with metastasis possibly via inducing tumor-associated macrophages in colorectal cancer. *Oncotarget*, 2017. **8**(45): p. 78598
15. Yin, C., et al., SALL4-mediated upregulation of exosomal miR-146a-5p drives T-cell exhaustion by M2 tumor-associated macrophages in HCC. *OncolImmunology*, 2019. **8**(7): p. e1601479
16. Zhou, S.-L., et al., miR-28-5p-IL-34-macrophage feedback loop modulates hepatocellular carcinoma metastasis. *Hepatology*, 2016. **63**(5): p. 1560-1575
17. Cai, X., et al., Re-polarization of tumor-associated macrophages to pro-inflammatory M1 macrophages by microRNA-155. *Journal of Molecular Cell Biology*, 2012. **4**(5): p. 341-343
18. He, M., et al., MicroRNA-155 Regulates Inflammatory Cytokine Production in Tumor-associated Macrophages via Targeting C/EBP $\beta$  - *Cellular & Molecular Immunology*. *Cellular & Molecular Immunology*, 2009. **6**: p. 343-352
19. Xun, J., et al., Cancer-derived exosomal miR-138-5p modulates polarization of tumor-associated macrophages through inhibition of KDM6B. *Theranostics*, 2021. **11**(14): p. 6847
20. Liu, Y., et al., An miR-340-5p-macrophage feedback loop modulates the progression and tumor microenvironment of glioblastoma multiforme - *Oncogene*. *Oncogene*, 2019.

**38:** p. 7399-7415

21. Zhang, B., et al., INT-HA induces M2-like macrophage differentiation of human monocytes via TLR4-miR-935 pathway. *Cancer Immunology, Immunotherapy*, 2019. **68**(2): p. 189-200
22. Li, D., et al., miR-498 inhibits autophagy and M2-like polarization of tumor-associated macrophages in esophageal cancer via MDM2/ATF3. *Epigenomics*, 2021
23. Chen, X., et al., Exosomes derived from hypoxic epithelial ovarian cancer deliver microRNA-940 to induce macrophage M2 polarization. *Oncology Reports*, 2017. **38**(1): p. 522-528
24. Jiang, B., et al., MiR-217 Inhibits M2-Like Macrophage Polarization by Suppressing Secretion of Interleukin-6 in Ovarian Cancer. *Inflammation*, 2019. **42**(5): p. 1517-1529
25. Shi, Y., et al., miR-106b-5p Inhibits IRF1/IFN- $\beta$  Signaling to Promote M2 Macrophage Polarization of Glioblastoma. *OncoTargets and therapy*, 2020. **13**: p. 7479
26. Zhao, S., et al., Tumor-derived exosomal miR-934 induces macrophage M2 polarization to promote liver metastasis of colorectal cancer. *Journal of Hematology & Oncology*, 2020. **13**(1): p. 1-19
27. Sonda, N., et al., miR-142-3p Prevents Macrophage Differentiation during Cancer-Induced Myelopoiesis. *Immunity*, 2013. **38**(6): p. 1236-1249
28. Tong, F., et al., HPV+ HNSCC-derived exosomal miR-9 induces macrophage M1 polarization and increases tumor radiosensitivity. *Cancer letters*, 2020. **478**: p. 34-44
29. Lin, X., et al., miR-195-5p/NOTCH2-mediated EMT modulates IL-4 secretion in colorectal cancer to affect M2-like TAM polarization. *Journal of Hematology &*

Oncology, 2019. 12(1): p. 1-14
